# Supplementary material for: Pre-imaginal conditioning alters adult sex pheromone response in Drosophila
Source: PeerJ. 2018 Sep 27;6:e5585. doi: 10.7717/peerj.5585 (PMC6164551; doi:10.7717/peerj.5585)
Supplement: Data S1 — The dataset is organised according to figures. [file peerj-06-5585-s008.xlsx]

## Sheet: Feuil1_HID
1	491.532	1	83.9349	1	2.41229
2	844.742	2	13.449	2	3.22704
3	607.598	3	67.4528	3	1.3853
4	750.959	4	39.4456	4	1.4492
5	495.834	5	20.4554	5	300.08
6	460.834	6	10.5963	6	253.989
7	1983.06	7	10.7583	7	212.45
8	1302.53	8	20.8548	8	300.057
9	1844.33	9	43.5445	9	289.034
10	546.335	10	16.6441	10	414.115
11	34.4339	11	14.4235	11	299.918
12	26.8684	12	63.4635	12	412.419
13	12.6297	13	47.6159	13	333.314
14	28.0962	14	9.52364
15	58.1574	15	35.9036
16	18.2987	16	29.566
17	6.26922	17	0.239631
18	25.3393	18	1.52679
19	28.7695	19	3.62186
20	20.816	20	0

## Sheet: Feuil1_HID1
1	491.532	2	844.742	3	607.598	4	750.959	5	495.834	6	460.834	7	1983.06	8	1302.53	9	1844.33	10	546.335	11	34.4339	12	26.8684	13	12.6297	14	28.0962	15	58.1574	16	18.2987	17	6.26922	18	25.3393	19	28.7695	20	20.816	1	491.532	1	83.9349	2	13.449	3	67.4528	4	39.4456
																																								2	844.742
																																								3	607.598
																																								4	750.959
																																								5	495.834
																																								6	460.834
																																								7	1983.06
																																								8	1302.53
																																								9	1844.33
																																								10	546.335
																																								11	34.4339
																																								12	26.8684
																																								13	12.6297
																																								14	28.0962
																																								15	58.1574
																																								16	18.2987
																																								17	6.26922
																																								18	25.3393
																																								19	28.7695
																																								20	20.816
[truncated: 62 more columns]

## Sheet: Feuil1_HID2
1	460.834	2	6.26922	3	9.52364	3.97131	0	5	212.45
0.971314	491.532	1.97131	10.5963	3	14.4235	4.02869	0	5	253.989
1.02869	495.834	2.02869	10.7583	3	16.6441	3.97131	0.239631	5	289.034
1	546.335	1.97131	12.6297	3	20.8548	4.02869	0.239631	5	299.918
1	607.598	2.02869	13.449	3	29.566	4	1.3853	5.05737	300.057
1	750.959	2	18.2987	3	35.9036	4	1.4492	4.94263	300.08
1	844.742	1.97131	20.4554	3	43.5445	4	1.52679	5	333.314
1	1302.53	2.02869	20.816	3	47.6159	4	2.41229	4.97131	412.419
1	1844.33	2	25.3393	3	63.4635	4	3.22704	5.02869	414.115
1	1983.06	2	26.8684			4	3.62186
		1.97131	28.0962
		2.02869	28.7695
		2	34.4339
		2	39.4456
		2	58.1574
		2	67.4528
		2	83.9349

## Sheet: Fig_1_a
50 CTRL eggs	50 washed eggs
(ng)	(ng)
12.0124	0
13.1284	0
14.2574	0
14.9144	0
13.6644	0
15.0354	0
11.0124	0
14.9124	0
10.4804	0
10.7124	0

## Sheet: Fig_1_c
	Control males			Males derived from washed eggs
cVA amount	n	Courtship		n	Courtship
0 ng	107	91		35	28
200 ng	27	21
300 ng	33	28
350 ng	30	17		29	25
400 ng	53	28
500 ng	68	37
600 ng	43	17		63	50
700 ng	40	14
800 ng	30	9
1000 ng	30	6		29	26
2000 ng				19	15

## Sheet: Fig_1_d
	Control males											Males derived from washed eggs
cVA amount	0 ng	200 ng	300 ng	350 ng	400 ng	500 ng	600 ng	700 ng	800 ng	1000 ng		0 ng	350 ng	600 ng	1000 ng	2000 ng
	0.494444	0.372222	0	0.0411111	0.0211111	0.256667	0	0	0	0		0.06	0.207778	0.555556	0.0422222	0.25
	0.244444	0.301136	0	0.322222	0.0466667	0.147778	0	0.00888889	0.294444	0		0.183333	0.276667	0.3	0.138889	0.18
	0.383333	0.162791	0.602222	0	0.117778	0.217778	0	0.317778	0.116667	0.144444		0.54	0.877778	0.355556	0.0688889	0.3
	0.402222	0.45283	0.207778	0.571111	0.0433333	0.31	0	0	0.206667	0		0.455556	0.26087	0	0.183333	0
	0.233333	0.39875	0.211111	0.165556	0.131111	0.317778	0	0	0.325556	0		0.622222	0.616667	0.144444	0.605556	0
	0	0.623377	0.155556	0	0	0	0.196667	0	0	0		0.533333	0.593333	0.544444	0.237778	0
	0	0.726027	0	0	0	0	0	0.382222	0	0		0.266667	0.0111111	0	0.578889	0.64
	0.521111	0.926346	0.0511111	0	0	0.203333	0	0	0	0		0.0833333	0.0944444	0.581111	0.611111	0.13
	0.582222	0	0.493333	0.126667	0	0.0866667	0	0.00888889	0	0.0533333		0.3	0.483333	0.488889	0.726667	0.52
	0.66852	0.642963	0	0.137778	0.0522222	0	0.234444	0	0	0.186667		0.266667	0	0.15	0	0.111111
	0	0	0	0.0977778	0	0	0	0	0.0911111	0		0	0.2	0.455556	0.00888889	0
	0.222222	0.242222	0.303333	0	0	0.107778	0	0	0	0		0.266667	0.0166667	0	0.238889	0.0833333
	0.566667	0.527778	0.0511111	0.243333	0.287778	0.532222	0.0388889	0	0	0		0.372222	0.773333	0.122222	0.366154	0.414634
	0.633333	0.34	0.682222	0	0	0.376667	0	0	0.247778	0		0	0.672222	0.433333	0.183333	0.333333
	0	0.508889	0.574444	0.241111	0.0255556	0.131111	0.0133333	0.102222	0	0		0.316667	0.666667	0	0.772222	0.316667
	0	0	0.533333	0	0	0	0.158889	0	0	0		0	0	0.472222	0.466667	0.733333
	0.633333	0.613333	0.0755556	0.344444	0.411111	0	0	0	0.321111	0.0433333		0.3	0.716667	0.1	0.322222	0.7
	0.533333	0	0.317778	0	0.237778	0	0.118889	0	0	0		0.122222	0.0166667	0.366667	0	0.866667
	0.433333	0	0.675556	0	0.345556	0.847778	0.0455556	0	0	0		0.133333	0.37	0.388889	0.677778	0.276667
	0.73	0.28	0.216667	0.683333	0.663333	0	0.205556	0.167778	0	0		0	0	0.0333333	0.436667
	0.111111	0.426667	0.09	0.0988889	0	0	0	0.228889	0	0		0	0.211111	0	0
	0	0	0.484444	0	0	0	0.0111111	0.0433333	0.483333	0.512222		0.733333	0	0	0.138889
	0	0.436667	0.221111	0.214444	0.00555556	0	0	0	0	0		0.194444	0.15	0.263333	0.496667
	0.416667	0.781111	0.0444444	0.581111	0	0.402222	0.183333	0	0	0.274444		0.0222222	0.411111	0	0.133333
	0.527778	0.448889	0.387778	0.444444	0	0.101111	0	0.118889	0	0		0	0.2	0.222222	0.506667
	0.3	0.104444	0.202222	0	0.273333	0.257778	0.245556	0	0	0		0	0.283333	0.0666667	0.822222
	0.766667	0.411111	0.166667	0.296667	0	0.206667	0	0.308889	0	0		0.538889	0.366667	0.0333333	0.00555556
	0.805556		0.0411111	0.0988889	0.468889	0.215556	0.246667	0	0.223333	0		0.322222	0.816667	0.416667	0.811111
	0.216667		0.582222	0	0	0.202222	0	0.0611111	0	0		0.144444	0.255556	0.0333333	0.405556
	0.216667		0.2	0	0.338889	0	0	0	0	0		0.233333		0
	0.0511111		0.293333		0	0.136667	0	0				0		0.111111
	0		0.33		0.131111	0.276667	0	0.211111				0.332222		0.0111111
	0		0.272222		0	0	0.0533333	0.00333333				0.611111		0.577778
	0.544444				0	0.591111	0.454444	0				0.244444		0.216667
	0.748889				0	0.771111	0	0				0.411111		0.45
	0				0.0866667	0	0	0						0
	0.192222				0.193333	0.392222	0.0755556	0.17						0.0833333
	0.626667				0.28	0.266667	0	0						0.255556
	0.343333				0	0	0.03	0						0.748889
	0				0.472222	0.15	0	0						0.205556
	0				0.447778	0	0.59							0.405556
	0.318889				0	0.122222	0							0.511111
	0.304444				0.0166667	0.2	0							0.45
	0.117778				0.398889	0								0.1
	0.0855556				0	0.176667								0.0111111
	0.235556				0	0								0.0444444
	0.777778				0.101111	0								0.183333
	0.616667				0.227778	0.104444								0
	0.592222				0	0								0
	0.148889				0.205556	0								0.366667
	0.0722222				0	0								0.0666667
	0.465556				0	0								0.0333333
	0.356667				0.0344444	0.321111								0.3
	0					0.242222								0.111111
	0.357778					0								0.327778
	0.336667					0								0.788889
	0.138889					0								0.533333
	0.832222					0.0655556								0
	0.177778					0.161111								0
	0.337778					0.404444								0.138889
	0.684444					0.181111								0.0666667
	0.0577778					0								0.183333
	0.305556					0								0.0444444
	0.428889					0
	0.195556					0.195556
	0.466667					0
	0.178889					0.231111
	0.632222					0
	0
	0.277778
	0.102222
	0.485556
	0.342222
	0.474444
	0.306667
	0.601111
	0.544444
	0.423333
	0.07
	0.472222
	0.532222
	0.278889
	0.443333
	0.493333
	0
	0.667778
	0.281111
	0.106667
	0.393333
	0.541111
	0.235556
	0.502222
	0.0144444
	0.376667
	0.52
	0.448889
	0.383333
	0.311111
	0.237778
	0
	0.437778
	0.623333
	0.654444
	0.285556
	0.221111
	0.324444
	0.757778

## Sheet: Fig_1_e
	Courtship Frequency
Adult test cVA	0ng	350ng	600ng	0ng	350ng	600ng	600ng	600ng
EGG	CTRL			Wash
FOOD	WT1			Plain			+WT2 eggs	+cVA
n	107	30	43	35	29	63	20	20
Courtship	91	17	17	28	25	50	9	15

## Sheet: Fig_1_f
	Courtship Index
Adult test cVA	0ng	350ng	600ng	0ng	350ng	600ng	600ng	600ng
EGG	CTRL			Wash
FOOD	WT1			Plain			+WT2 eggs	+cVA
	0.494444	0.0411111	0	0.06	0.207778	0.555556	0.344444	0.166667
	0.244444	0.322222	0.284444	0.183333	0.276667	0.3	0.365556	0.472222
	0.383333	0	0	0.54	0.877778	0.355556	0.0944444	0.688889
	0.402222	0.571111	0	0.455556	0.26087	0	0	0
	0.233333	0.165556	0.0111111	0.622222	0.616667	0.144444	0	0.366667
	0	0	0	0.533333	0.593333	0.544444	0.1	0.705556
	0	0	0	0.266667	0.0111111	0	0.477778	0.544444
	0.521111	0	0.705556	0.0833333	0.0944444	0.581111	0.572222	0.716667
	0.582222	0.126667	0.155556	0.3	0.483333	0.488889	0	0.605556
	0.66852	0.137778	0.288889	0.266667	0	0.15	0	0.641111
	0	0.0977778	0	0	0.2	0.455556	0	0.255556
	0.222222	0	0	0.266667	0.0166667	0	0.375556	0
	0.566667	0.243333	0.0722222	0.372222	0.773333	0.122222	0.194444	0
	0.633333	0	0	0	0.672222	0.433333	0	0.844444
	0	0.241111	0	0.316667	0.666667	0	0	0.544444
	0	0	0	0	0	0.472222	0.35	0.577778
	0.633333	0.344444	0.377778	0.3	0.716667	0.1	0	0.761111
	0.533333	0	0	0.122222	0.0166667	0.366667	0	0
	0.433333	0	0.422222	0.133333	0.37	0.388889	0	0.0888889
	0.73	0.683333	0	0	0	0.0333333	0	0
	0.111111	0.0988889	0	0	0.211111	0
	0	0	0	0.733333	0	0
	0	0.214444	0	0.194444	0.15	0.263333
	0.416667	0.581111	0	0.0222222	0.411111	0
	0.527778	0.444444	0	0	0.2	0.222222
	0.3	0	0.196667	0	0.283333	0.0666667
	0.766667	0.296667	0	0.538889	0.366667	0.0333333
	0.805556	0.0988889	0	0.322222	0.816667	0.416667
	0.216667	0	0	0.144444	0.255556	0.0333333
	0.216667	0	0.234444	0.233333		0
	0.0511111		0	0		0.111111
	0		0	0.332222		0.0111111
	0		0.0388889	0.611111		0.577778
	0.544444		0	0.244444		0.216667
	0.748889		0.0133333	0.411111		0.45
	0		0.158889			0
	0.192222		0			0.0833333
	0.626667		0.118889			0.255556
	0.343333		0.0455556			0.748889
	0		0.205556			0.205556
	0		0			0.405556
	0.318889		0.0111111			0.511111
	0.304444		0			0.45
	0.117778		0.183333			0.1
	0.0855556		0			0.0111111
	0.235556		0.245556			0.0444444
	0.777778		0			0.183333
	0.616667		0.246667			0
	0.592222		0			0
	0.148889		0			0.366667
	0.0722222		0			0.0666667
	0.465556		0			0.0333333
	0.356667		0.0533333			0.3
	0		0.454444			0.111111
	0.357778		0			0.327778
	0.336667		0			0.788889
	0.138889		0.0755556			0.533333
	0.832222		0			0
	0.177778		0.03			0
	0.337778		0			0.138889
	0.684444		0.59			0.0666667
	0.0577778		0			0.183333
	0.305556		0			0.0444444
	0.428889
	0.195556
	0.466667
	0.178889
	0.632222
	0
	0.277778
	0.102222
	0.485556
	0.342222
	0.474444
	0.306667
	0.601111
	0.544444
	0.423333
	0.07
	0.472222
	0.532222
	0.278889
	0.443333
	0.493333
	0
	0.667778
	0.281111
	0.106667
	0.393333
	0.541111
	0.235556
	0.502222
	0.0144444
	0.376667
	0.52
	0.448889
	0.383333
	0.311111
	0.237778
	0
	0.437778
	0.623333
	0.654444
	0.285556
	0.221111
	0.324444
	0.757778

## Sheet: Fig_2_a
Post-mating egg laying (Day)	+1D	+10D
	cVA on egg (ng)	cVA on egg (ng)
	0.25	0
	0.18	0
	0.26	0
	0.38	0
	0.2	0
	0.43	0
	0.29	0
	0.12	0
	0.21	0
	0.3	0
	0.13
	0.24

## Sheet: Fig_2_b
Post-mating egg laying (Day)	+1D	+1D	+10D	+10D
Adult test cVA (ng)	0	600	0	600
n	144	139	65	59
	0.2	0	0	0.7
	0	0.06	0.31	0.15
	0.01	0.05	0.89	0.6
	0	0.07	0.4	0.65
	0.7	0.1	0.49	0.6
	0	0.5	0.15	0.72
	0.65	0.69	0	0.8
	0	0.6	0.27	0.74
	0.05	0.1	0.75	0.04
	0.15	0.4	0.02	0.38
	0.1	0.01	0.47	0.04
	0.39	0	0.2	0.37
	0.01	0	0.41	0.12
	0.06	0.17	0.39	0.65
	0.3	0.07	0.55	0.6
	0.9	0.1	0	0.29
	0.3	0.68	0	0.39
	0.02	0.4	0.21	0.26
	0.5	0.07	0.21	0.75
	0	0.75	0.47	0.04
	0.04	0.18	0.58	0.7
	0.15	0.06	0.42	0.58
	0.06	0.07	0.5	0.56
	0.45	0.06	0.78	0.8
	0.9	0.58	0.39	0.74
	0	0.36	0.62	0.22
	0.4	0.4	0.69	0.14
	0.45	0.6	0.7	0.23
	0.28	0.17	0.55	0.5
	0.03	0	0.39	0.79
	0.14	0	0.51	0.58
	0.6	0.14	0.59	0.54
	0.42	0.02	0.14	0
	0.1	0.35	0.95	0.59
	0.45	0.18	0.52	0.39
	0.55	0.04	0.26	0.4
	0.1	0.13	0.22	0.02
	0.01	0.07	0.35	0.1
	0.01	0.07	0.13	0.11
	0.45	0.55	0.88	0.01
	0.18	0.25	0.29	0.05
	0.44	0	0.29	0.55
	0.04	0.21	0.91	0.06
	0.11	0.22	0.04	0.35
	0.39	0.65	0.51	0.65
	0	0.02	0.03	0.08
	0.7	0.2	0.26	0.2
	0.29	0.1	0.29	0
	0.65	0.1	0.2	0.9
	0.35	0.09	0.4	0.03
	0	0.15	0.3	0
	0	0.05	0.04	0.6
	0	0.36	0.36	0.48
	0	0.15	0	0.9
	0.38	0.4	0	0.49
	0.05	0	0.02	0.02
	0	0.1	0.3	0.07
	0.47	0	0.8	0.29
	0.69	0	0.4	0.3
	0.16	0.05	0.03
	0.49	0.55	0.57
	0.17	0.02	0.14
	0.15	0.06	0.39
	0	0.01	0.49
	0	0.6	0.4
	0.31	0
	0.06	0.01
	0.27	0.41
	0.1	0.01
	0.36	0
	0.42	0.49
	0	0.03
	0.02	0.2
	0.46	0.02
	0	0.1
	0	0.37
	0	0.25
	0.15	0
	0.46	0.4
	0.42	0
	0.22	0.11
	0.79	0.19
	0.49	0
	0.48	0
	0.06	0
	0.39	0.02
	0	0.17
	0.62	0
	0.64	0.39
	0.29	0.21
	0.42	0.46
	0.79	0.14
	0.85	0.22
	0.49	0.49
	0	0.39
	0.17	0.2
	0.02	0.17
	0.4	0.74
	0.37	0.14
	0.6	0.12
	0.66	0.19
	0.49	0.4
	0.1	0
	0	0.11
	0.47	0.17
	0.59	0
	0.6	0.16
	0.55	0
	0.06	0.7
	0.35	0.25
	0.4	0.46
	0.5	0.03
	0.56	0.24
	0.45	0.3
	0.03	0.25
	0.35	0.2
	0	0.49
	0.64	0.5
	0.61	0
	0.36	0.2
	0.06	0.24
	0.35	0.32
	0.4	0.09
	0.5	0.4
	0.56	0.37
	0.07	0.5
	0.8	0.7
	0.67	0.7
	0.2	0.6
	0.01	0.35
	0.65	0
	0.25	0.11
	0.16	0.57
	0.85	0.01
	0.01	0.1
	0.06	0
	0.34	0
	0.17	0.01
	0.09	0.07
	0.07
	0.14
	0
	0.65
	0.35

[truncated: 13 more sheets: Fig_3a, Fig_3b, Fig_4a, Fig_4b, Fig_S1, Fig_S2, Fig_S3a, Fig_S3b, Fig_S4, Fig_S5, Fig_S6a, Fig_S6b, Fig_S7]
