# Supplementary material for: Pre-imaginal conditioning alters adult sex pheromone response in Drosophila
Source: PeerJ journal article supplement (doi:10.7717/peerj.5585), 2018-09-27

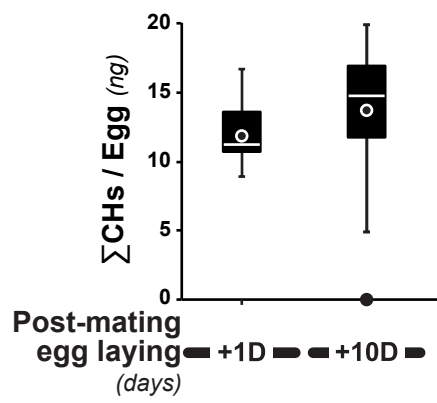

Supplement: Fig_S7.pdf [file Fig_S7.pdf]
