# Supplementary material for: Pre-imaginal conditioning alters adult sex pheromone response in Drosophila
Source: PubMed Central journal article supplement (PMC6164551; doi:10.7717/peerj.5585), 2018-09-27

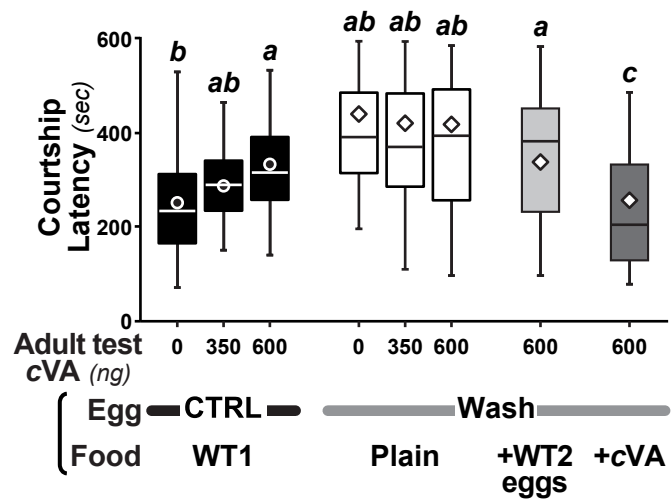

Supplement: peerj-06-5585-s004.pdf [file peerj-06-5585-s004.pdf]
